# Supplementary material for: Effectiveness of removals of the invasive lionfish: how many dives are needed to deplete a reef?
Source: PeerJ journal article supplement (doi:10.7717/peerj.3043), 2017-02-23

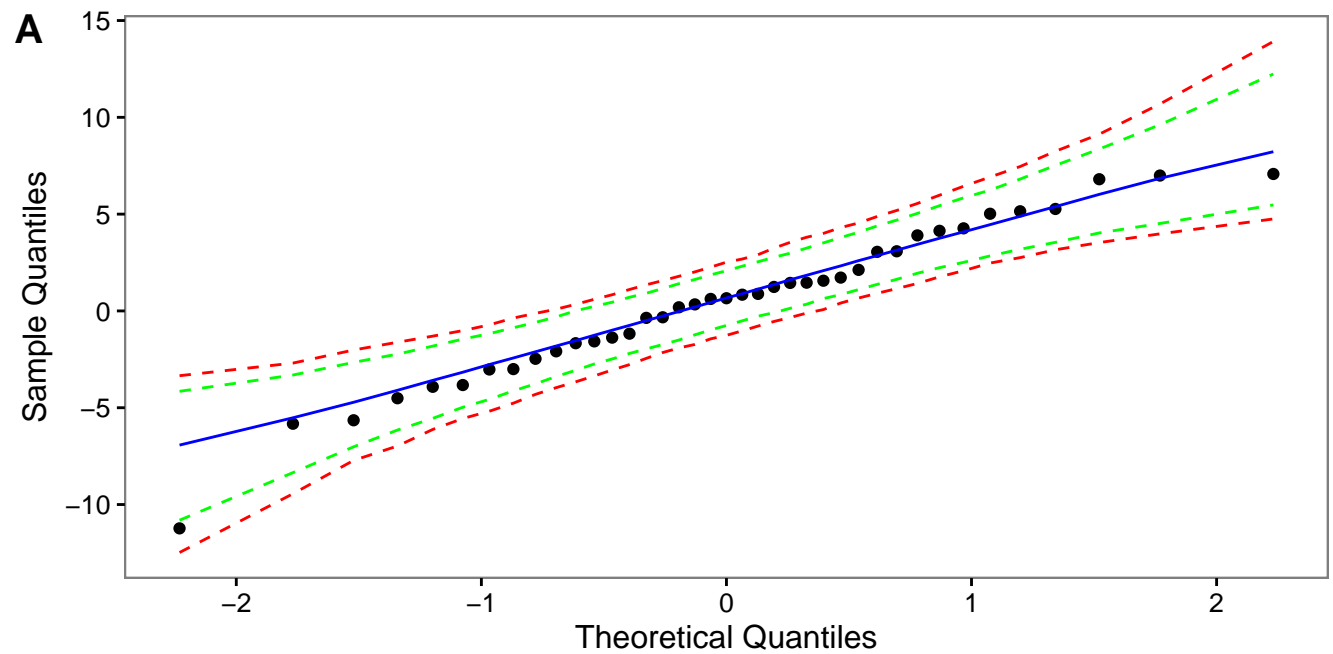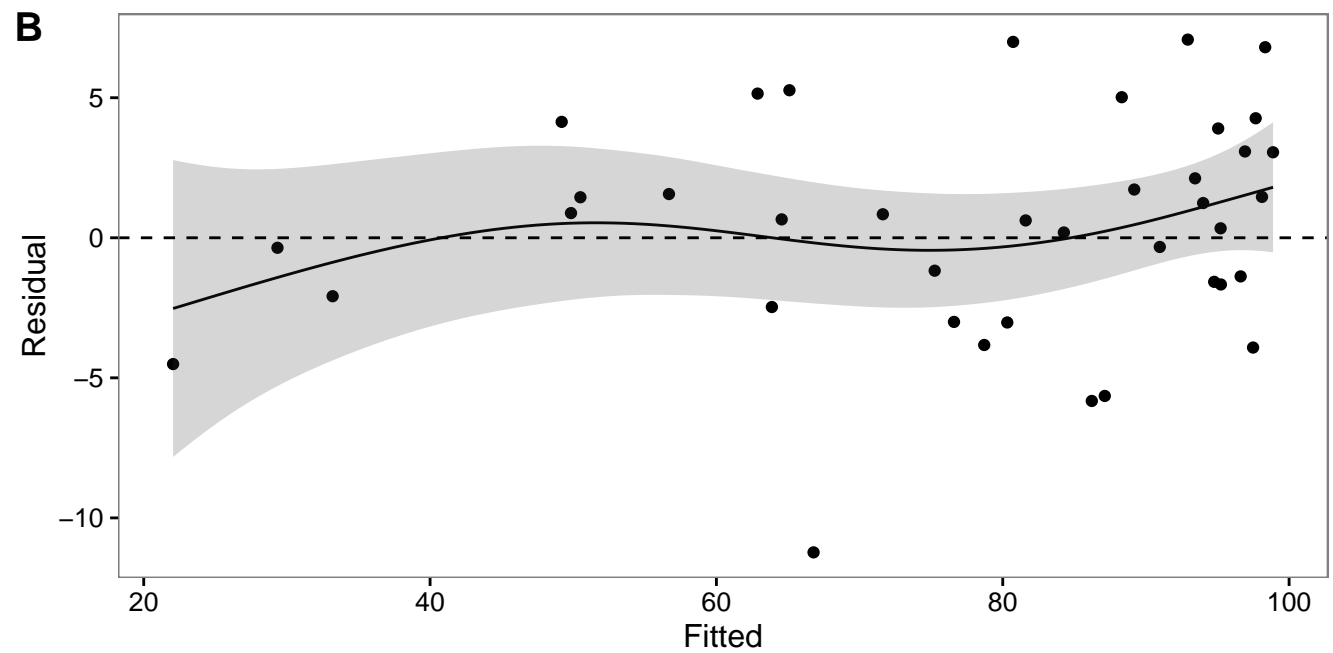

Supplement: Supplemental_Figure_S4.pdf [file Supplemental_Figure_S4.pdf]
